# Supplementary material for: The Cassidinae beetles of Longnan County (Jiangxi, China): overview and community composition
Source: Biodivers Data J. 2019 Oct 18;7:e39053. doi: 10.3897/BDJ.7.e39053 (PMC6814652; doi:10.3897/BDJ.7.e39053)
Supplement: Supplementary material 2 — Host plants and their corresponding Cassidinae beetles at Longnan County, Jiangxi Province, China [file bdj-07-e39053-s002.xlsx]

## Sheet: plant-cassidiane associations
Host-plant			Cassidinae
species	genus	family	species	genus	tribes
Smilax sp1&	Smilax&	Smilacaceae&	Agonita sculpturata Gressitt.*	Agonita	Gonophorini
Smilax davidiana A.DC.&	Smilax	Smilacaceae	Agonita tricolor Chûjô.*	Agonita	Gonophorini
Carex cruciata Wahlenb.&	Carex&	Cyperaceae&	Agonita foveicollis Chen & Tan.*	Agonita	Gonophorini
Phyllostachys bambusoides Siebold & Zucc.&	Phyllostachys&	Poaceae&	Agonita indenticulata Pic.*	Agonita	Gonophorini
Bambusa gibba McClure.@	Bambusa@	Poaceae@	Agonita chinensis Weise.#	Agonita	Gonophorini
Indosasa crassiflora McClure.@	Indosasa@	Poaceae@
Miscanthus floridulus (Labill.) Warb. ex K.Schum. & Lauterb.&	Miscanthus	Poaceae	Asamangulia longispina Gressitt.#	Asamangulia	Hispini
			Downesia tarsata Baly.*	Downesia	Gonophorini
			Hispellinus chinensis Gressitt.*	Hispellinus	Hispini
			Hispellinus callicanthus Bates.#	Hispellinus	Hispini
			Klitispa mutilata Chen & Sun.*	Klitispa	Gonophorini
			Rhadinosa nigrocyanea Motschulsky.$	Rhadinosa	Hispini
			Rhadinosa sp	Rhadinosa	Hispini
			Rhadinosa fleutiauxi Baly.#	Rhadinosa	Hispini
			Rhadinosa sp	Rhadinosa	Hispini
Ipomoea batatas (L.) Lam.	Ipomoea	Convolvulaceae	Aspidimorpha furcata Thunberg.	Aspidimorpha	Aspidimorphini
			Cassida circumdata Herbst.	Cassida	Cassidini
			Laccoptera nepalensis Boheman.	Laccoptera	Aspidimorphini
Paulownia fortunei (Seem.) Hemsl.	Paulownia	Paulowniaceae	Basiprionota chinensis Fabricius.#	Basiprionota	Basiprionotini
Paulownia taiwaniana T.W. Hu & H.J. Chang.&	Paulownia&	Paulowniaceae&	Basiprionota bisignata Boheman.	Basiprionota	Basiprionotini
Premna microphylla Turcz.&	Premna&	Lamiaceae&	Basiprionota whitei Boheman.	Basiprionota	Basiprionotini
-	-	-	Callispa pseudapicalis Yu.*	Callispa	Callispini
-	-	Poaceae	Callispa elliptica Gressitt.#	Callispa	Callispini
-	-	Poaceae	Callispa bowringii Baly.	Callispa	Callispini
-	-	Poaceae	Callispa fortunii Baly.	Callispa	Callispini
-	-	-	Cassida fuscorufa Motschulsky.#	Cassida	Cassidini
-	-	-	Cassida probata Spaeth.*	Cassida	Cassidini
Aidia canthioides (Champ. ex Benth.) Masam.&	Aidia&	Rubiaceae&	Cassida cherrapunjiensis Maulik.*	Cassida	Cassidini
			Dactylispa pici Uhmann.#	Dactylispa	Hispini
Elsholtzia ciliata (Thunb.) Hyl.&	Elsholtzia&	Lamiaceae	Cassida sigillata Gorham.#	Cassida	Cassidini
Photinia serratifolia (Desf.) Kalkman &	Photinia&	Rosaceae	Cassida versicolor Boheman.	Cassida	Cassidini
			Dactylispa maculithorax Gestro.#	Dactylispa	Hispini
Photinia bodinieri H.L‚v. &	Photinia&	Rosaceae	Cassida versicolor Boheman.	Cassida	Cassidini
-	-	-	Cassida quadriramosa Gressitt.#	Cassida	Cassidini
Achyranthes bidentata Blume.&	Achyranthes&	Amaranthaceae&	Cassida variabilis Chen et Zia.*	Cassida	Cassidini
Prunus spinulosa Siebold & Zucc.&	Prunus&	Rosaceae&	Dactylispa maculithorax Gestro.#	Dactylispa	Hispini
Lophatherum gracile Brongn.@	Lophatherum@	Poaceae@	Dactylispa approximata Gressitt.*	Dactylispa	Hispini
			Dactylispa longispina Gressitt.*	Dactylispa	Hispini
Gardenia jasminoides J.Ellis.&	Gardenia&	Rubiaceae&	Dactylispa pici Uhmann.#	Dactylispa	Hispini
			Dactylispa nigrodiscalis Gressitt.#	Dactylispa	Hispini
Callicarpa formosana Rolfe.&	Callicarpa	Lamiaceae	Dactylispa higoniae Lewis.#	Dactylispa	Hispini
			Dactylispa paucispinaGressitt.#	Dactylispa	Hispini
Callicarpa integerrima Champ. ex Benth.&	Callicarpa	Lamiaceae	Dactylispa higoniae Lewis.#	Dactylispa	Hispini
Callicarpa kochiana Makino.&	Callicarpa	Lamiaceae	Dactylispa higoniae Lewis.#	Dactylispa	Hispini
			Dactylispa paucispinaGressitt.#	Dactylispa	Hispini
			Thlaspida biramosa Boheman.*	Thlaspida	Cassidini
Adina pilulifera (Lam.) Franch. ex Drake.&	Adina&	Rubiaceae&	Dactylispa nigrodiscalis Gressitt.#	Dactylispa	Hispini
Aster trinervius Roxb. ex Roxb.&	Aster&	Compositae&	Dactylispa angulosa Solsky.#	Dactylispa	Hispini
Quercus ciliaris C.C.Huang & Y.T.Chang.&	Quercus&	Fagaceae&	Dactylispa subquadrata Baly.*	Dactylispa	Hispini
-	-	Fagaceae&	Dactylispa latispina Gestro.*	Dactylispa	Hispini
-	-	-	Dactylispa ramuligera Chapuis.*	Dactylispa	Hispini
Callicarpa rubella Lindl.&	Callicarpa&	Lamiaceae&	Dactylispa paucispinaGressitt.#	Dactylispa	Hispini
Callicarpa longipes Dunn.&	Callicarpa&	Lamiaceae&	Dactylispa paucispinaGressitt.#	Dactylispa	Hispini
			Thlaspida biramosa Boheman.*	Thlaspida	Cassidini
-	-	Fagaceae	Dactylispa excisa Kraatz.#	Dactylispa	Hispini
Phyllostachys glauca McClure.&	Phyllostachys&	Poaceae	Dactylispa setifera Chapuis.*	Dactylispa	Hispini
Setaria palmifolia (J.Koenig) Stapf.&	Setaria&	Poaceae&	Dactylispa longispina Gressitt.*	Dactylispa	Hispini
			Dactylispa spinosa Weber.*	Dactylispa	Hispini
			Dactylispa albopilosa Gestro.*	Dactylispa	Hispini
Rubus reflexus Ker Gawl.&	Rubus	Rosaceae	Dactylispa xanthopus Gestro.#	Dactylispa	Hispini
Rubus lambertianus Ser.&	Rubus	Rosaceae	Dactylispa xanthopus Gestro.#	Dactylispa	Hispini
Rubus alceifolius Poir.&	Rubus	Rosaceae	Dactylispa xanthopus Gestro.#	Dactylispa	Hispini
Rubus amphidasys Focke.&	Rubus	Rosaceae	Dactylispa xanthopus Gestro.#	Dactylispa	Hispini
-	-	Poaceae	Dactylispa sauteri Uhmann.#	Dactylispa	Hispini
Panicum brevifolium L.&	Panicum&	Poaceae	Dactylispa feae Gestro.#	Dactylispa	Hispini
-	-	-	Dactylispa reitteri Spaeth.*	Dactylispa	Hispini
-	-	-	Dactylispa stoetzneri Uhmann.*	Dactylispa	Hispini
-	-	-	Dactylispa pungens Boheman.#	Dactylispa	Hispini
Berchemia floribunda (Wall.) Brongn.&	Berchemia&	Rhamnaceae&	Dactylispa klapperichi Uhmann.*	Dactylispa	Hispini
Indocalamus tessellatus (Munro) Keng f.&	Indocalamus&	Poaceae	Downesia vandykei Gressitt.*	Downesia	Gonophorini
Eurya nitida Korth.&	Eurya&	Pentaphylacaceae&	Notosacantha sauteri Spaeth.*	Notosacantha	Notosacanthini
Hovenia acerba Lindl.&	Hovenia	Rhamnaceae	Platypria melli Uhmann.#	Platypria	Hispini
-	-	-	Platypria alces Gressitt.*	Platypria	Hispini
Pollia japonica Thunb.@	Pollia@	Commelinaceae@	Prionispa champaka Maulik.$	Prionispa	Oncocephalini

## Sheet: symbol descriptions
Symbol	Indications
*	new record in Jiangxi
#	new record in Longnan
$	new record in Longnan, which was previously published by our group
-	unknown or unidentified plant
&	new record of host plant species/genus/family for the corresponding Cassidinae species
@	new record of Cassidinae host plant which was previously published by our group
JLS	Jiulianshan
AJS	Anjishan
LGS	Leigongshan
